# Supplementary material for: Identification of Genomic Loci and Candidate Genes Related to Seed Tocopherol Content in Soybean
Source: MDPI journal article supplement (doi:10.3390/plants11131703), 2022-06-27
Supplement: s1 [file s1]

**Table S5. Candidate genes in the QTL region on chromosome 5**

| Position | Chromosome | Ref | Alt  | Effect        | Type  | Gene ID                | Ortholog in Arabidopsis | Description                                                                  |
|----------|------------|-----|------|---------------|-------|------------------------|-------------------------|------------------------------------------------------------------------------|
| 41807338 | Chr05      | T   | G    | Nonsynonymous | SNP   | <i>Glyma.05G243400</i> | AT1G18070.2             | Translation elongation factor EF1A/initiation factor IF2gamma family protein |
| 41799525 | Chr05      | T   | C    | Upstream      | SNP   | <i>Glyma.05G243300</i> | AT1G18060.1             | -                                                                            |
| 41855575 | Chr05      | A   | G    | Upstream      | SNP   | <i>Glyma.05G244100</i> | AT1G18100.1             | PEBP (phosphatidylethanolamine-binding protein) family protein               |
| 41864477 | Chr05      | G   | C    | Upstream      | SNP   | <i>Glyma.05G244200</i> | AT3G18050.1             | -                                                                            |
| 41836669 | Chr05      | T   | -    | Upstream      | InDel | <i>Glyma.05G243800</i> | AT3G18130.1             | receptor for activated C kinase 1C                                           |
| 41850737 | Chr05      | -   | TTTT | Upstream      | InDel | <i>Glyma.05G244000</i> | -                       | -                                                                            |
| 41855657 | Chr05      | CA  | -    | Upstream      | InDel | <i>Glyma.05G244100</i> | AT1G18100.1             | PEBP (phosphatidylethanolamine-binding protein) family protein               |
